# Supplementary material for: Transformation of molecular compounds with Ba(Sr)/Al/Si and Ca(Sr, Ba)/Ti(Zr, Hf)/Si heteroelements as new efficient route to metal silicate materials
Source: Royal Society of Chemistry journal article supplement (doi:10.1039/c8dt03796e), 2019-01-01
Supplement: c8dt03796e1.pdf [file c8dt03796e1.pdf]

Supporting information for

**Transformation of molecular compounds with Ba(Sr)/Al/Si and  
Ca(Sr, Ba)/Ti(Zr, Hf)/Si heteroelements as new efficient route to  
metal silicate materials**

R. Petrus,<sup>a</sup> A. Drąg-Jarząbek,<sup>b</sup> J. Utko,<sup>b</sup> T. Lis<sup>b</sup> and P. Sobota<sup>c</sup>

<sup>a</sup> Faculty of Chemistry, Wrocław University of Science and Technology, 23  
Smoluchowskiego, 50-370 Wrocław, Poland

<sup>b</sup> Faculty of Chemistry, University of Wrocław, 14 F. Joliot-Curie, 50-383 Wrocław, Poland

<sup>c</sup> Polish Center for Technology Development, 147 Stabłowicka, 54-066 Wrocław

Corresponding author: Prof. Dr. Piotr Sobota, [Piotr.Sobota@port.org.pl](mailto:Piotr.Sobota@port.org.pl),

## Crystallographic Data for Compounds 1-9.

**Table S1.** Crystal and data collection parameters for compounds 1-5.

| Crystal                                                                                | 3·THF                                                                                             | 3·2C <sub>7</sub> H <sub>8</sub>                                                                  | 4·2THF                                                                                              | 5·1.6C <sub>7</sub> H <sub>8</sub>                                                                    | 5·4THF                                                                                            |
|----------------------------------------------------------------------------------------|---------------------------------------------------------------------------------------------------|---------------------------------------------------------------------------------------------------|-----------------------------------------------------------------------------------------------------|-------------------------------------------------------------------------------------------------------|---------------------------------------------------------------------------------------------------|
| Chemical formula                                                                       | C <sub>106</sub> H <sub>138</sub> O <sub>26</sub> Si <sub>4</sub> Sr <sub>4</sub> Ti <sub>2</sub> | C <sub>116</sub> H <sub>146</sub> O <sub>25</sub> Si <sub>4</sub> Sr <sub>4</sub> Ti <sub>2</sub> | C <sub>110</sub> H <sub>147</sub> ClO <sub>27</sub> Si <sub>4</sub> Sr <sub>4</sub> Zr <sub>2</sub> | C <sub>113.2</sub> H <sub>144.8</sub> O <sub>26</sub> Si <sub>4</sub> Sr <sub>4</sub> Hf <sub>2</sub> | C <sub>118</sub> H <sub>164</sub> Hf <sub>2</sub> O <sub>30</sub> Si <sub>4</sub> Sr <sub>4</sub> |
| Formula Mass                                                                           | 2386.80                                                                                           | 2498.96                                                                                           | 2582.00                                                                                             | 2741.32                                                                                               | 2882.30                                                                                           |
| Crystal system                                                                         | Triclinic                                                                                         | Triclinic                                                                                         | Monoclinic                                                                                          | Monoclinic                                                                                            | Monoclinic                                                                                        |
| Space group                                                                            | <i>P</i> $\bar{1}$                                                                                | <i>P</i> $\bar{1}$                                                                                | <i>P</i> 2 <sub>1</sub> / <i>c</i>                                                                  | <i>P</i> 2 <sub>1</sub> / <i>c</i>                                                                    | <i>C</i> 2/ <i>c</i>                                                                              |
| <i>a</i> /Å                                                                            | 14.926 (4)                                                                                        | 13.359 (4)                                                                                        | 11.599 (4)                                                                                          | 11.641 (2)                                                                                            | 26.366 (10)                                                                                       |
| <i>b</i> /Å                                                                            | 14.964 (4)                                                                                        | 15.235 (6)                                                                                        | 23.593 (5)                                                                                          | 23.511 (3)                                                                                            | 23.735 (6)                                                                                        |
| <i>c</i> /Å                                                                            | 15.660 (4)                                                                                        | 15.870 (6)                                                                                        | 21.871 (6)                                                                                          | 21.993 (5)                                                                                            | 21.213 (7)                                                                                        |
| $\alpha$ /°                                                                            | 107.74 (3)                                                                                        | 112.91 (3)                                                                                        |                                                                                                     |                                                                                                       |                                                                                                   |
| $\beta$ /°                                                                             | 95.45 (2)                                                                                         | 93.04 (3)                                                                                         | 98.86 (3)                                                                                           | 98.79(2)                                                                                              | 103.96 (4)                                                                                        |
| $\gamma$ /°                                                                            | 118.92 (3)                                                                                        | 90.47 (3)                                                                                         |                                                                                                     |                                                                                                       |                                                                                                   |
| Unit cell volume/Å <sup>3</sup>                                                        | 2790(2)                                                                                           | 2970(2)                                                                                           | 5914 (3)                                                                                            | 5948.6 (2)                                                                                            | 12883 (8)                                                                                         |
| Temperature/K                                                                          | 100(2)                                                                                            | 85(2)                                                                                             | 100(2)                                                                                              | 80(2)                                                                                                 | 80(2)                                                                                             |
| <i>Z</i>                                                                               | 1                                                                                                 | 1                                                                                                 | 2                                                                                                   | 2                                                                                                     | 4                                                                                                 |
| Radiation type                                                                         | MoK $\alpha$                                                                                      | MoK $\alpha$                                                                                      | MoK $\alpha$                                                                                        | MoK $\alpha$                                                                                          | MoK $\alpha$                                                                                      |
| Absorption coefficient, $\mu$ /mm <sup>-1</sup>                                        | 2.147                                                                                             | 2.020                                                                                             | 2.093                                                                                               | 3.627                                                                                                 | 3.356                                                                                             |
| No. of reflections measured                                                            | 23340                                                                                             | 22615                                                                                             | 34598                                                                                               | 58858                                                                                                 | 26475                                                                                             |
| No. of independent reflections                                                         | 13134                                                                                             | 12686                                                                                             | 16589                                                                                               | 14293                                                                                                 | 12045                                                                                             |
| No. of observed reflections ( <i>I</i> > 2 $\sigma$ ( <i>I</i> ))                      | 9024                                                                                              | 9912                                                                                              | 8910                                                                                                | 11070                                                                                                 | 7080                                                                                              |
| <i>R</i> <sub>int</sub>                                                                | 0.0621                                                                                            | 0.0265                                                                                            | 0.0677                                                                                              | 0.0642                                                                                                | 0.0541                                                                                            |
| Final <i>R</i> <sub>1</sub> values ( <i>I</i> > 2 $\sigma$ ( <i>I</i> ))               | 0.0647                                                                                            | 0.0375                                                                                            | 0.0709                                                                                              | 0.0424                                                                                                | 0.0628                                                                                            |
| Final <i>wR</i> ( <i>F</i> <sup>2</sup> ) values ( <i>I</i> > 2 $\sigma$ ( <i>I</i> )) | 0.1421                                                                                            | 0.0785                                                                                            | 0.1141                                                                                              | 0.1033                                                                                                | 0.1324                                                                                            |
| Final <i>R</i> <sub>1</sub> values (all data)                                          | 0.1025                                                                                            | 0.0589                                                                                            | 0.1584                                                                                              | 0.0651                                                                                                | 0.1239                                                                                            |
| Final <i>wR</i> ( <i>F</i> <sup>2</sup> ) values (all data)                            | 0.1684                                                                                            | 0.0877                                                                                            | 0.1415                                                                                              | 0.1218                                                                                                | 0.1602                                                                                            |
| Goodness of fit on <i>F</i> <sup>2</sup>                                               | 1.034                                                                                             | 1.038                                                                                             | 1.009                                                                                               | 1.086                                                                                                 | 1.013                                                                                             |
| $\Delta\rho$ max/eÅ <sup>-3</sup>                                                      | 1.06                                                                                              | 0.58                                                                                              | 0.74                                                                                                | 1.12                                                                                                  | 1.19                                                                                              |
| $\Delta\rho$ min/eÅ <sup>-3</sup>                                                      | -1.27                                                                                             | -0.46                                                                                             | -0.78                                                                                               | -1.54                                                                                                 | -1.17                                                                                             |

**Table S2.** Crystal and data collection parameters for compounds **5-9**.

| Crystal                                                                                | 6·4THF                                                                                            | 7·1.8C <sub>7</sub> H <sub>8</sub> ·0.2CH <sub>2</sub> Cl <sub>2</sub>                                                  | 8·2C <sub>7</sub> H <sub>8</sub> ·2H <sub>2</sub> O                                               | 9·14C <sub>7</sub> H <sub>8</sub>                                                                                 |
|----------------------------------------------------------------------------------------|---------------------------------------------------------------------------------------------------|-------------------------------------------------------------------------------------------------------------------------|---------------------------------------------------------------------------------------------------|-------------------------------------------------------------------------------------------------------------------|
| Chemical formula                                                                       | C <sub>112</sub> H <sub>148</sub> Hf <sub>2</sub> O <sub>25</sub> Si <sub>4</sub> Sr <sub>3</sub> | C <sub>108.8</sub> H <sub>134.8</sub> Ca <sub>2</sub> Cl <sub>0.4</sub> O <sub>22</sub> Si <sub>4</sub> Zr <sub>2</sub> | C <sub>110</sub> H <sub>140</sub> Ca <sub>2</sub> Hf <sub>2</sub> O <sub>24</sub> Si <sub>4</sub> | C <sub>290</sub> H <sub>344</sub> Ba <sub>8</sub> Cl <sub>8</sub> O <sub>40</sub> Si <sub>8</sub> Zr <sub>4</sub> |
| Formula Mass                                                                           | 2626.50                                                                                           | 2183.71                                                                                                                 | 2395.71                                                                                           | 6441.55                                                                                                           |
| Crystal system                                                                         | Monoclinic                                                                                        | Triclinic                                                                                                               | Triclinic                                                                                         | Orthorhombic                                                                                                      |
| Space group                                                                            | <i>C2/c</i>                                                                                       | <i>P</i> $\bar{1}$                                                                                                      | <i>P</i> $\bar{1}$                                                                                | <i>Pbcn</i>                                                                                                       |
| <i>a</i> /Å                                                                            | 25.601 (3)                                                                                        | 11.421 (3)                                                                                                              | 11.394 (4)                                                                                        | 40.661 (6)                                                                                                        |
| <i>b</i> /Å                                                                            | 16.596 (3)                                                                                        | 14.263 (4)                                                                                                              | 14.120 (4)                                                                                        | 20.363 (3)                                                                                                        |
| <i>c</i> /Å                                                                            | 29.699 (6)                                                                                        | 19.107 (5)                                                                                                              | 19.167 (5)                                                                                        | 36.720 (5)                                                                                                        |
| $\alpha$ /°                                                                            |                                                                                                   | 103.64 (4)                                                                                                              | 100.03 (2)                                                                                        |                                                                                                                   |
| $\beta$ /°                                                                             | 96.88 (3)                                                                                         | 95.93 (4)                                                                                                               | 102.58 (3)                                                                                        |                                                                                                                   |
| $\gamma$ /°                                                                            |                                                                                                   | 113.43 (4)                                                                                                              | 112.84 (3)                                                                                        |                                                                                                                   |
| Unit cell volume/Å <sup>3</sup>                                                        | 12527 (4)                                                                                         | 2706.7 (18)                                                                                                             | 2656.4 (17)                                                                                       | 30403 (8)                                                                                                         |
| Temperature/K                                                                          | 85(2)                                                                                             | 101(2)                                                                                                                  | 80(2)                                                                                             | 100(2)                                                                                                            |
| <i>Z</i>                                                                               | 4                                                                                                 | 1                                                                                                                       | 1                                                                                                 | 4                                                                                                                 |
| Radiation type                                                                         | MoK $\alpha$                                                                                      | MoK $\alpha$                                                                                                            | MoK $\alpha$                                                                                      | MoK $\alpha$                                                                                                      |
| Absorption coefficient, $\mu$ /mm <sup>-1</sup>                                        | 3.022                                                                                             | 0.409                                                                                                                   | 2.167                                                                                             | 1.313                                                                                                             |
| No. of reflections measured                                                            | 37786                                                                                             | 21235                                                                                                                   | 17022                                                                                             | 73581                                                                                                             |
| No. of independent reflections                                                         | 13505                                                                                             | 10648                                                                                                                   | 9682                                                                                              | 31025                                                                                                             |
| No. of observed reflections ( <i>I</i> > 2 $\sigma$ ( <i>I</i> ))                      | 9206                                                                                              | 7403                                                                                                                    | 8831                                                                                              | 24888                                                                                                             |
| <i>R</i> <sub>int</sub>                                                                | 0.0487                                                                                            | 0.0846                                                                                                                  | 0.0361                                                                                            | 0.0431                                                                                                            |
| Final <i>R</i> <sub>1</sub> values ( <i>I</i> > 2 $\sigma$ ( <i>I</i> ))               | 0.1086                                                                                            | 0.0681                                                                                                                  | 0.0494                                                                                            | 0.0695                                                                                                            |
| Final <i>wR</i> ( <i>F</i> <sup>2</sup> ) values ( <i>I</i> > 2 $\sigma$ ( <i>I</i> )) | 0.2418                                                                                            | 0.1459                                                                                                                  | 0.1206                                                                                            | 0.1819                                                                                                            |
| Final <i>R</i> <sub>1</sub> values (all data)                                          | 0.1490                                                                                            | 0.1060                                                                                                                  | 0.0553                                                                                            | 0.0861                                                                                                            |
| Final <i>wR</i> ( <i>F</i> <sup>2</sup> ) values (all data)                            | 0.2675                                                                                            | 0.1688                                                                                                                  | 0.1247                                                                                            | 0.1923                                                                                                            |
| Goodness of fit on <i>F</i> <sup>2</sup>                                               | 1.154                                                                                             | 1.042                                                                                                                   | 1.092                                                                                             | 1.123                                                                                                             |
| $\Delta\rho$ max/eÅ <sup>-3</sup>                                                      | 3.16                                                                                              | 0.58                                                                                                                    | 3.66                                                                                              | 3.07                                                                                                              |
| $\Delta\rho$ min/eÅ <sup>-3</sup>                                                      | -5.08                                                                                             | -1.06                                                                                                                   | -1.90                                                                                             | -1.50                                                                                                             |

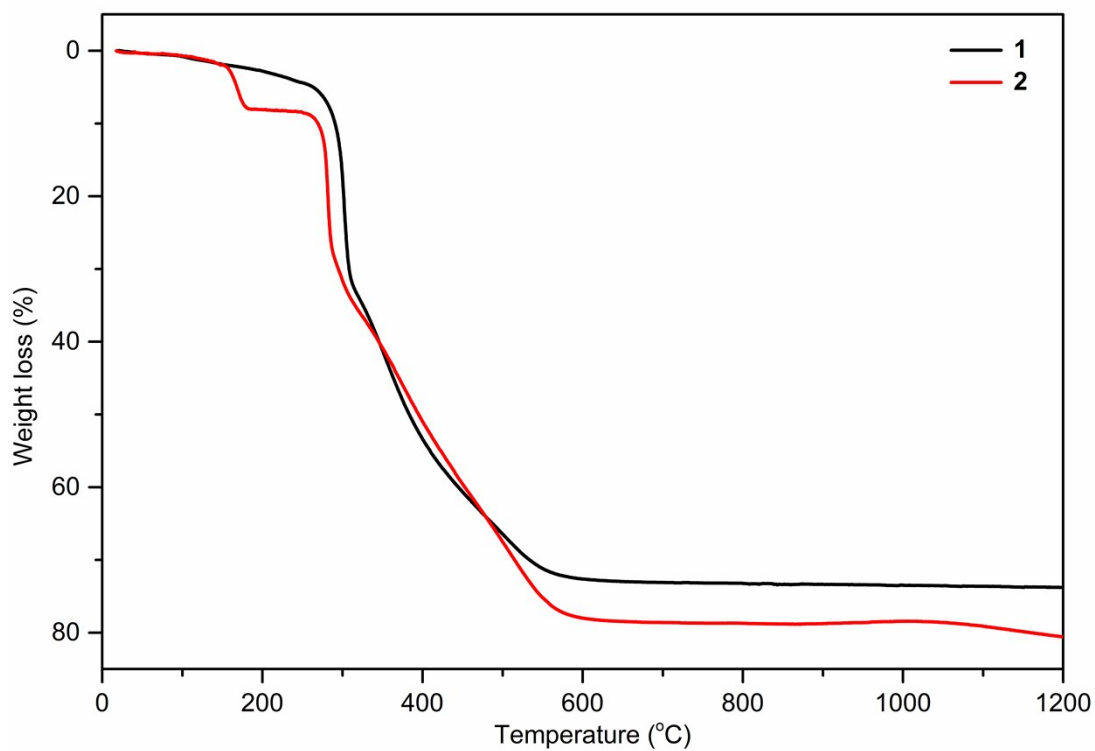

Fig.S1 TGA curves for **1–2** under N<sub>2</sub> with a heating rate of 10 °C min<sup>-1</sup>.

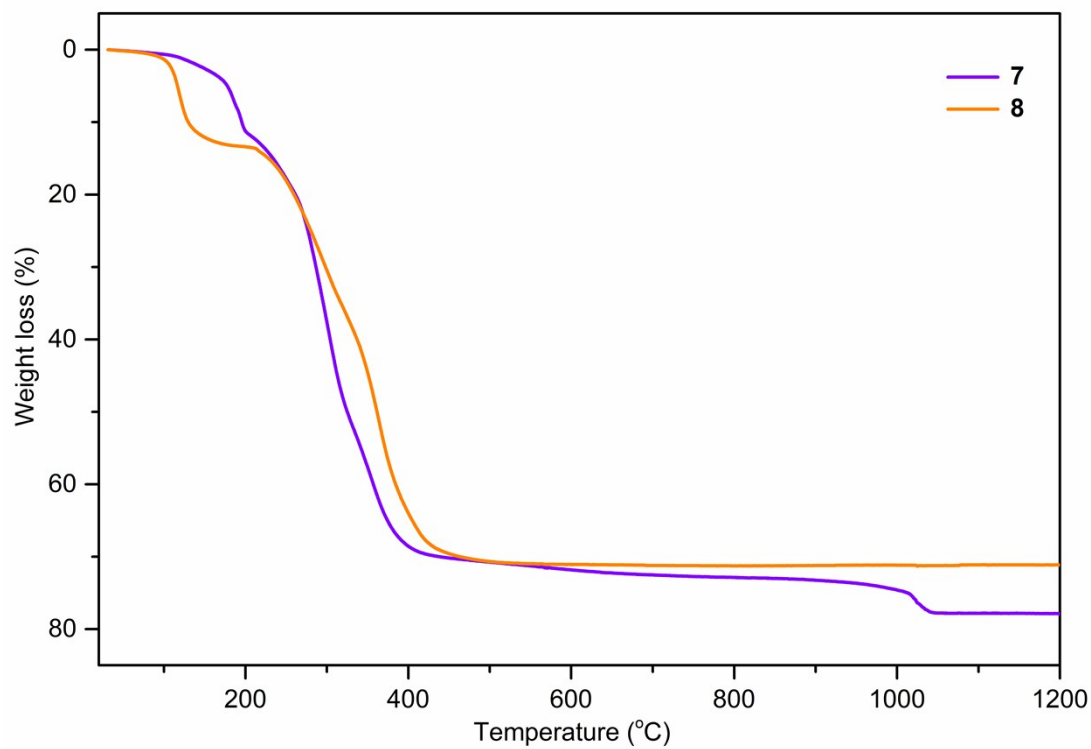

Fig.S2 TGA curves for **7–8** under N<sub>2</sub> with a heating rate of 10 °C min<sup>-1</sup>.
